# Supplementary material for: Sphingosine 1-Phosphate Receptor 2 Regulates the Migration, Proliferation, and Differentiation of Mesenchymal Stem Cells
Source: PubMed Central journal article supplement (PMC4888913; doi:10.23937/2469-570x/1410014), 2015-12-02
Supplement: NIHMS785016-supplement-01.pdf [file NIHMS785016-supplement-01.pdf]

**Supplemental Table 1:** Quantitative real time pcr and genotyping primers

| Gene         | Forward Primer                | Reverse Primer            |
|--------------|-------------------------------|---------------------------|
| S1PR1        | CTCCACCGTGCTCCCGCTCTA         | GGAGATGTTCTTGCGGAAGGTCAGG |
| S1PR2        | GCGTGGTCACCATCTTCTCC          | CGTCTGAGGACCAGCAACATC     |
| S1PR3        | CATCGCCTTCCTCATCAGTATCTTC     | CACAATCACTACGGTCCGCA      |
| S1PR4        | GCACCTTGAGCATAACAGGA          | CGGGGACAGACTGAGAGAGG      |
| S1PR5        | ACTGCTTAGGACGCCTGGAA          | CCGCACCTGACAGTAAATCCTT    |
| Oct4         | ACACCTGGCTTCGGATTTTCG         | GGCGATGTGGCTGATCTGCT      |
| Nanog        | GGTTGAAGACTAGCAATGGTCTGA      | TGCAATGGATGCTGGGATACTC    |
| Sox2         | GCACATGAACGGCTGGAGCAACG       | TGCTGCGAGTAGGACATGCTGTAGG |
| GAPDH        | CAATGACCCCTTCATTGACC          | GATCTCGCTCCTGGAAGATG      |
| Genotyping 1 | GCAGTGACAAAAGCTGCCGAATGCTGATG |                           |
| Genotyping 2 | AGATGGTGACCACGCAGAGCACGTAGTG  |                           |
| Genotyping 3 | TGACCGCTTCCTCGTGCTTTACGGTATCG |                           |

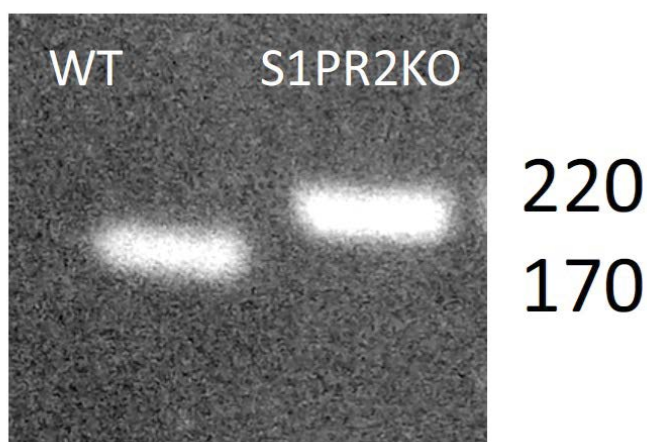

**Supplemental Figure 1:** Genotyping of S1PR2 KO animals A. PCR of DNA derived from the tail of wild type and knockout animals run with primers 1-3 shown in supplemental table 1.

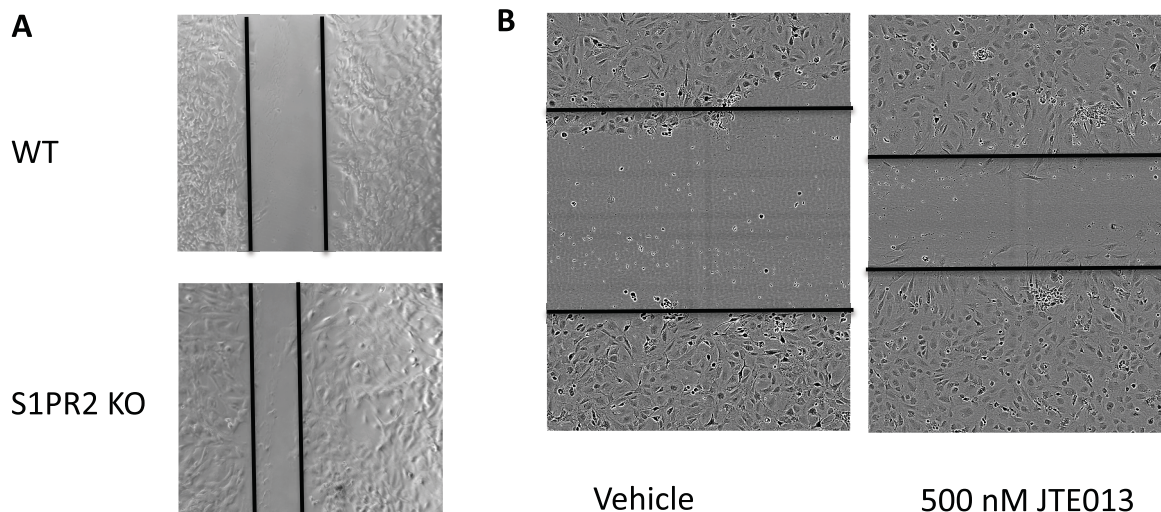

**Supplemental Figure 2:** Inhibition of S1PR2 promotes increased MSC migration. **A)** Wild type and S1PR2 KO MSCs were plated to confluence in 6 well plates for analysis of migration by scratch assay. Representative images from Figure 2b are shown; **B)** MSCs were treated with the indicated doses of JTE at the initiation of the scratch wound using Essen technology in a 96-well collagen coated plate. Representative images from Figure 2c are shown.

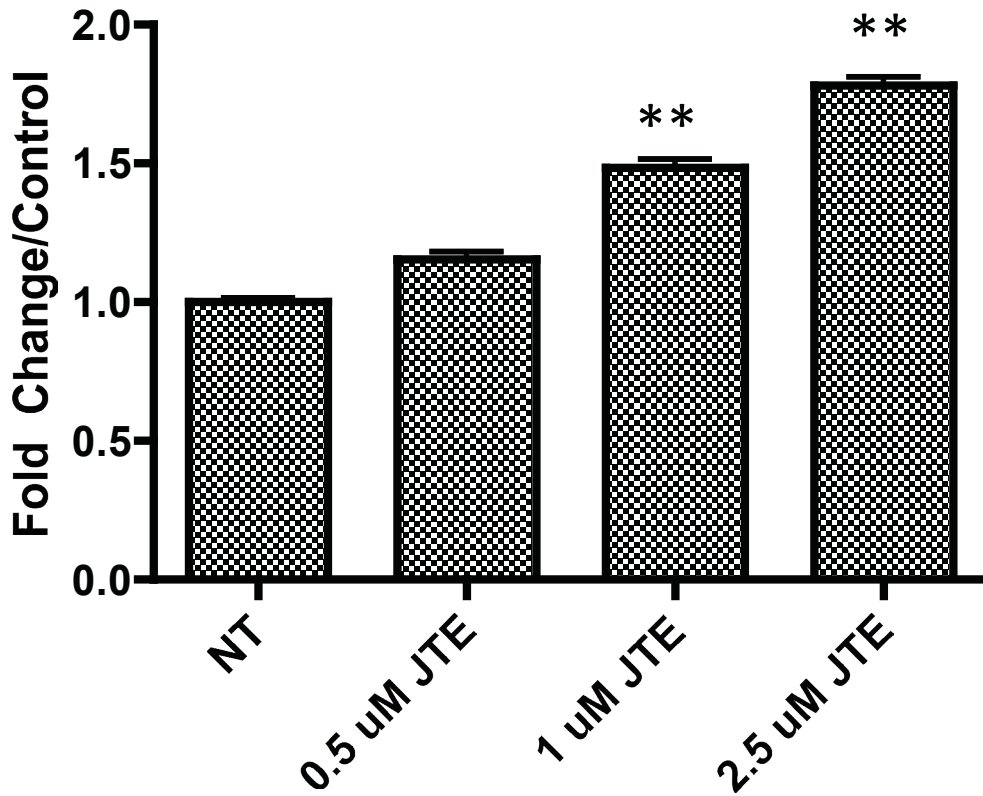

**Supplemental Figure 3:** JTE dose dependently increases MSC proliferation A. MTS evaluation of the proliferation of primary murine MSCs. Values represent the mean  $\pm$  the standard deviation. Significance was assessed using a student's t-test for  $p < 0.05$ .

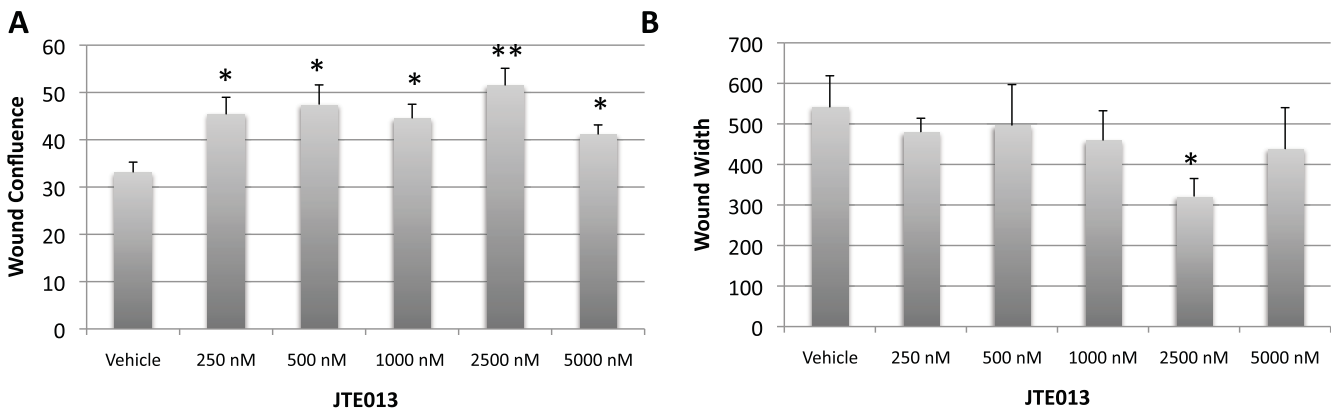

**Supplemental Figure 4:** JTE increases MSC proliferation A-B MSCs were treated with the indicated doses of JTE at the initiation of the scratch wound using Essen technology in a 96-well collagen coated plate. Wound confluence and width were evaluated by the Essen software based on a cell identification algorithm specific for the cells. Values represent the mean  $\pm$  the standard deviation.

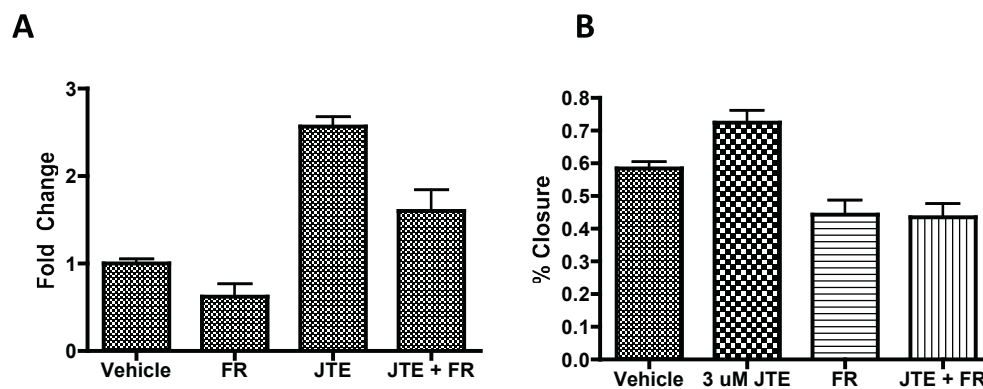

**Supplemental Figure 5:** Erk inhibitions abrogates JTE mediated increases in MSC proliferation A) MTS evaluation of MSC proliferation using primary murine MSCs treated with 1μM FR180204 delivered 30 minutes prior to JTE treatment; B) Wound closure of MSCs after 18 hours following scratch assay in primary murine MSCs. Groups are significantly different for A and B with  $p < 0.0001$  by one-way ANOVA.
